# Supplementary material for: High-throughput surface-enhanced Raman scattering sensors for near-infrared detection of biochemical molecules
Source: Royal Society of Chemistry journal article supplement (doi:10.1039/d2tc05542b), 2023-01-01
Supplement: d2tc05542b1.pdf [file d2tc05542b1.pdf]

## Supplementary Materials

### High-throughput Surface-enhanced Raman Scattering Sensors for Near-infrared Detecting Biochemical molecules

**Yifan Wang, Zhiming Chen, Pan Zeng, An Cao, Tao Zhang,<sup>a,c\*</sup> and  
Yue li<sup>a,b\*</sup>**

[a] Mr. Yifan Wang, Mr. Zhiming Chen, Ms. Pan Zeng, Mr. An Cao, Dr. Tao Zhang,<sup>a,c\*</sup>  
Prof. Yue Li\*

Key Laboratory of Materials Physics and Anhui Key Laboratory of Nanomaterials and  
Nanotechnology, Institute of Solid State Physics, Chinese Academy of Sciences, Hefei  
230031, P. R. China

E-mail: [yueli@issp.ac.cn](mailto:yueli@issp.ac.cn)

[b] Mr. Yifan Wang, Mr. Zhiming Chen, Ms. Pan Zeng, Mr. An Cao, Prof. Yue Li  
University of Science and Technology of China, Hefei, 230026, P.R. China

[c] Dr. Tao Zhang\*

School of Physical and Mathematical Sciences, Nanyang Technological University, 21  
Nanyang Link, Singapore 637371, Singapore

E-mail: [tao.zhang@ntu.edu.sg](mailto:tao.zhang@ntu.edu.sg)

## Figures

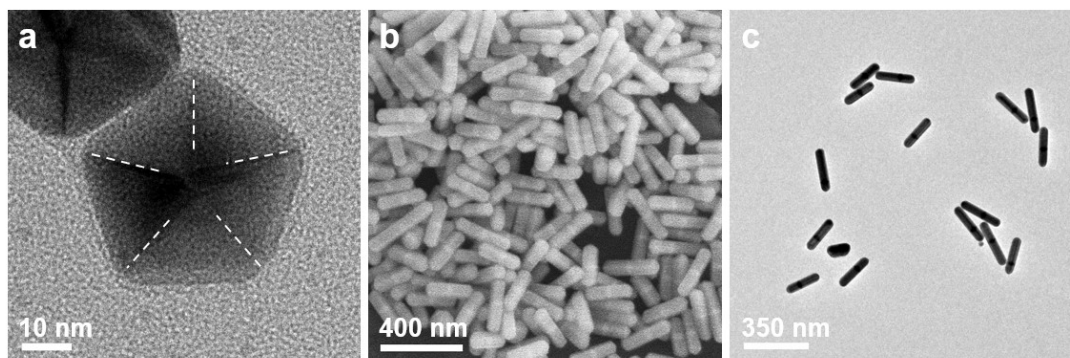

**Fig S1** (a) TEM image of Au decahedron. (b) Lower magnification SEM image of Au@Ag NRs and (c) lower magnification TEM image of Au@Ag NRs.

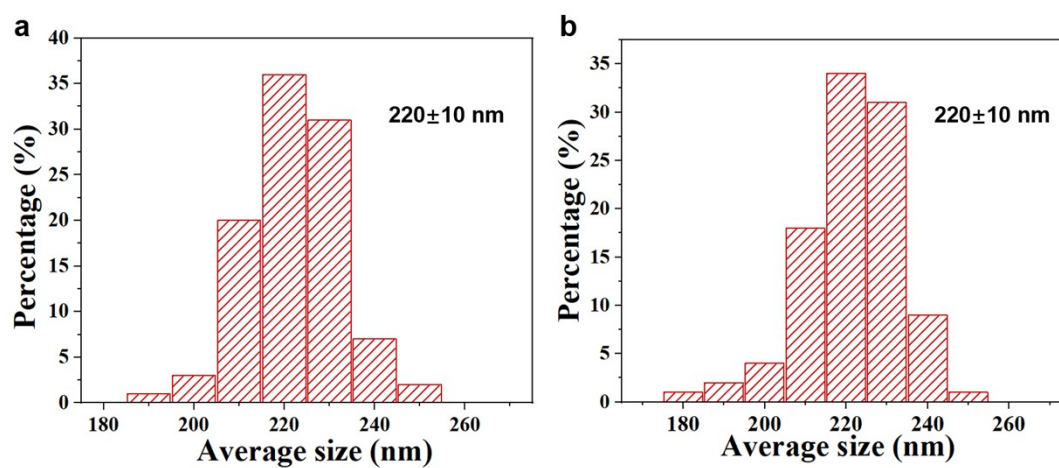

**Fig. S2** Size distribution of (a) Au@Ag NRs and (b) porous Au@AuAg NRs.

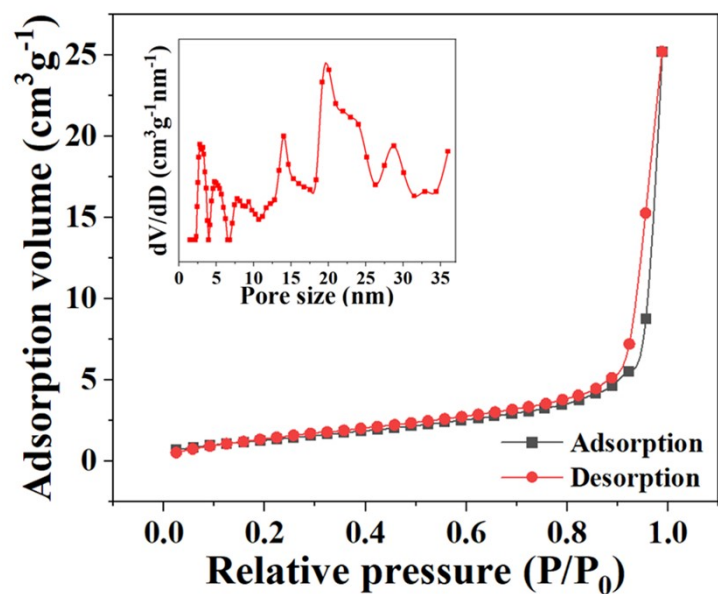

**Fig. S3**  $\text{N}_2$  sorption isotherms and pore size distribution of porous Au@AuAg NRs.

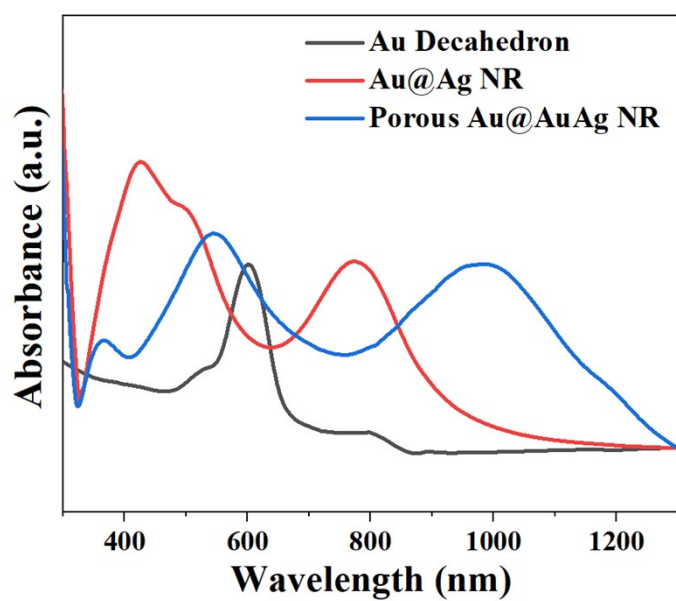

**Fig. S4** Absorption spectra of Au decahedron, Au@Ag NR and porous Au@AuAg NR.

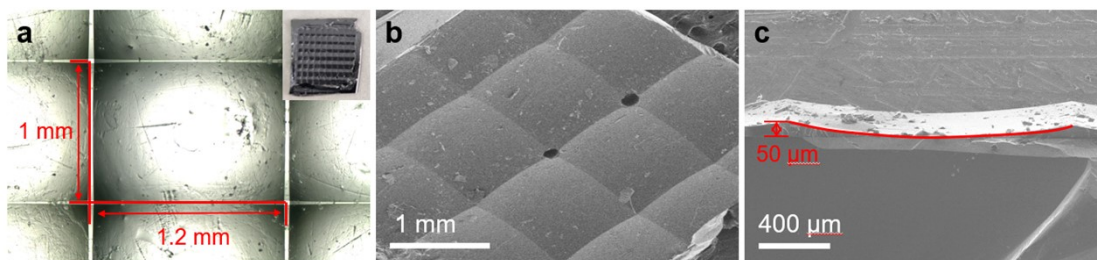

**Fig. S5** Images of gridded substrate for (a) optical microscope and (b,c) SEM.

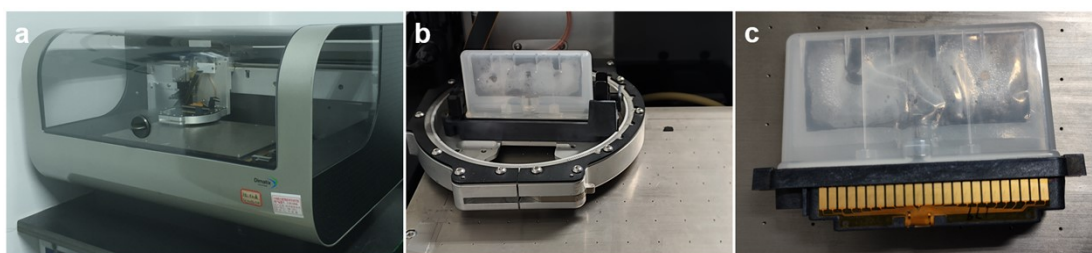

**Fig. S6** Images of (a) inkjet printer, (b) inkjet printer nozzle and (c) inkjet printer cartridge filled with porous Au@AuAg NRs.

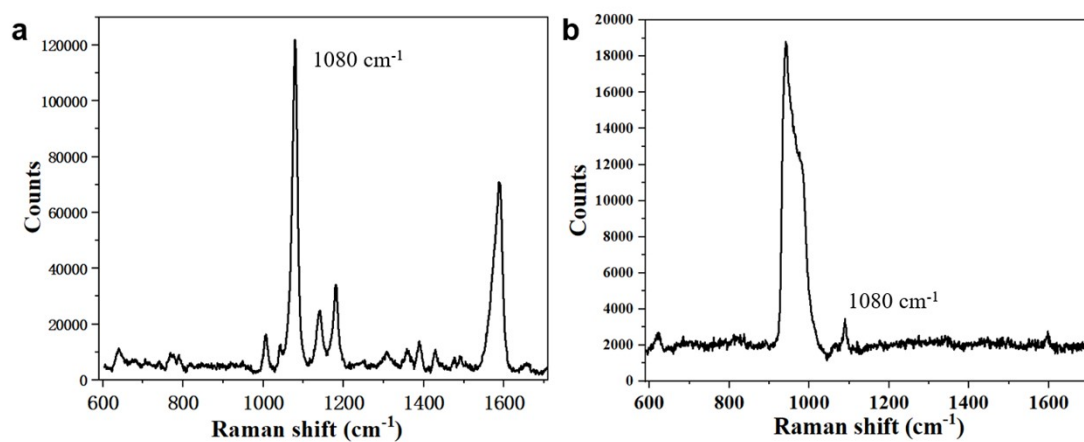

**Fig. S7** Images of (a) Raman signal obtained by dropping 1  $\mu\text{l}$  4-ATP ethanol solution ( $10^{-6}$  M) on porous Au@AuAg NRs substrate. (b) Normal Raman signal of 1  $\mu\text{l}$  of  $10^{-2}$  M 4-ATP ethanol solution dropped on the Si substrate.

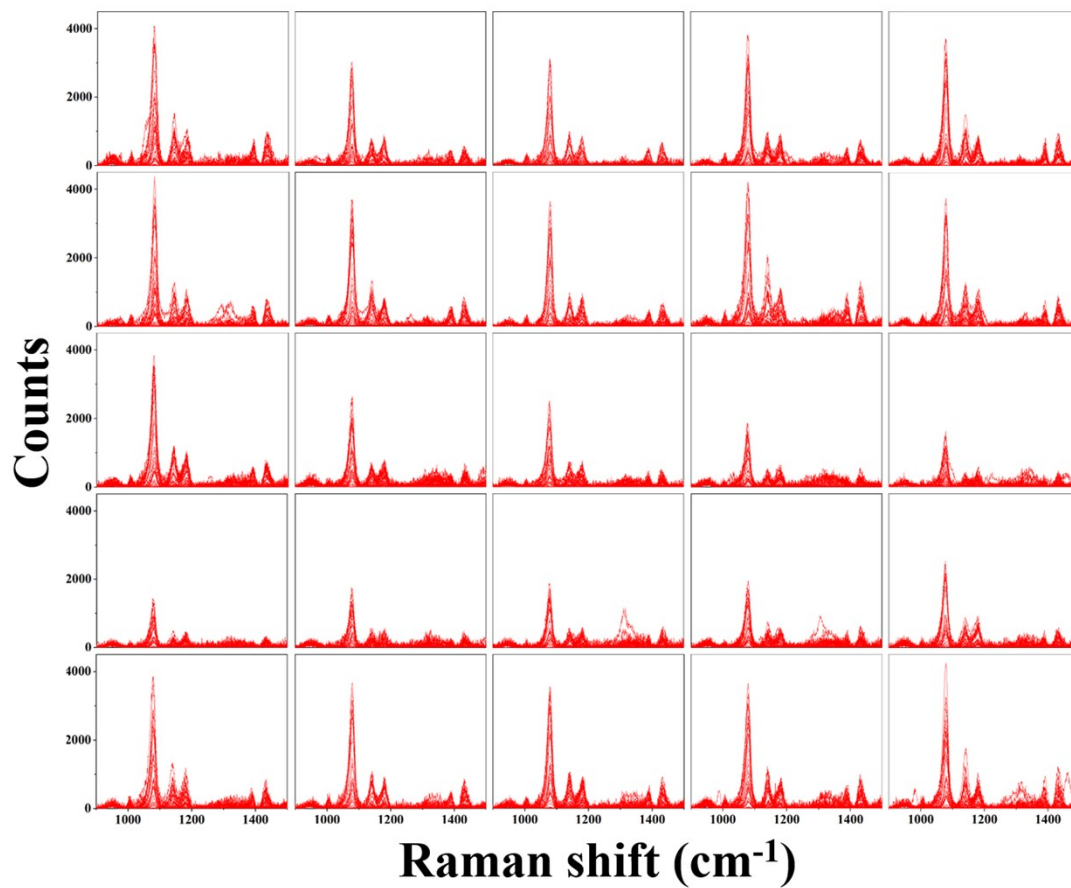

**Fig. S8** SERS spectra on the 25 array units with porous Au@AuAg NRs, each array unit has tested SERS signals on 7\*7 spots.

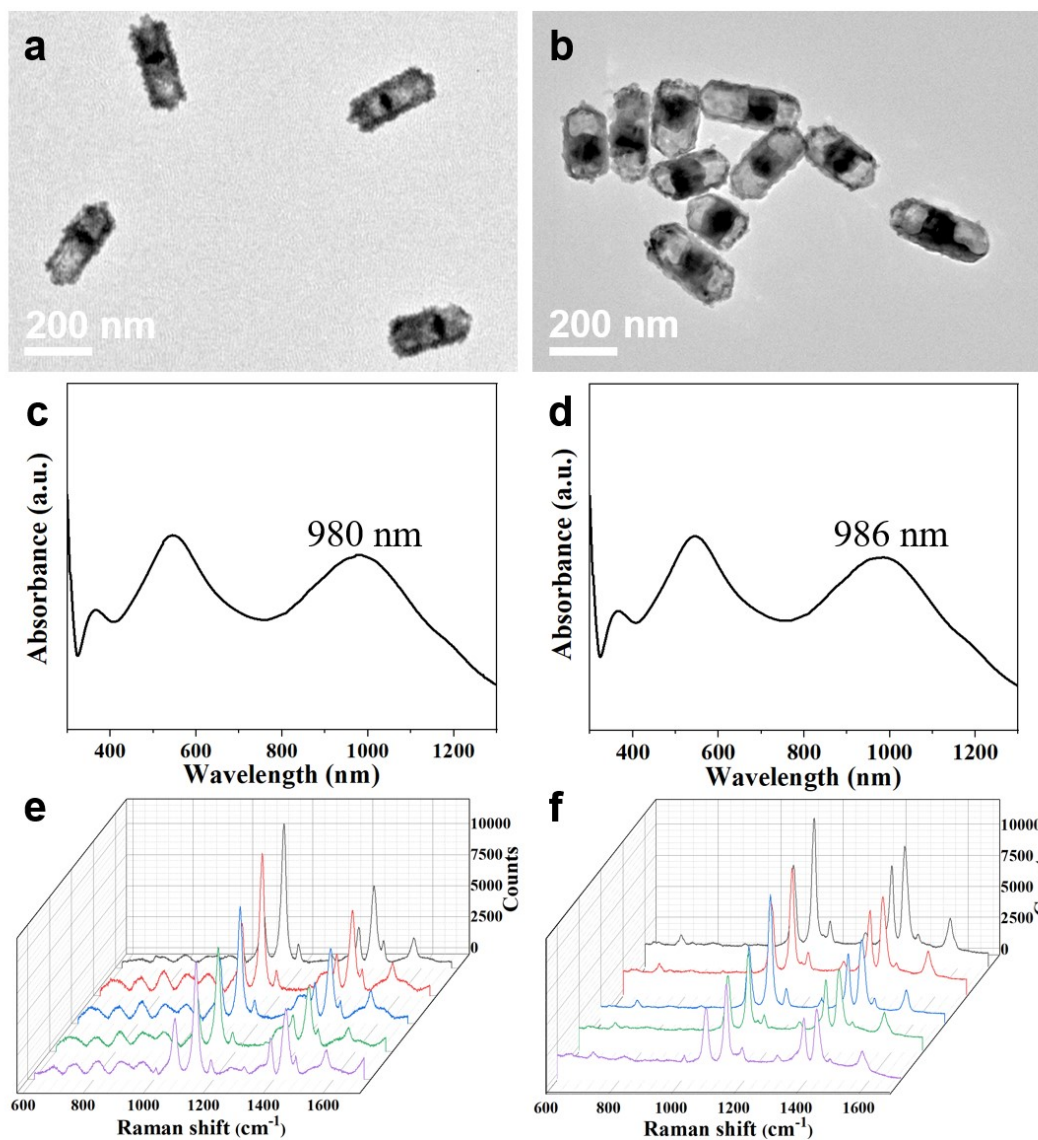

**Fig. S9** Comparison of two kinds of Au@AuAg NRs. (a) and (b) are TEM images of porous Au@AuAg NRs produced in different batches (treated by different amounts of HNO<sub>3</sub>, sample a: 8.3 mL while sample b: 16.6 mL). (c) and (d) are the corresponding absorption spectra of porous Au@AuAg NRs produced in different batches. (e) and (f) are SERS spectra of porous Au@AuAg NRs produced in different batches with 10<sup>-7</sup> M of 4-ATP.
